# Supplementary material
Source: Springer Nature journal article supplement (https://www.springermedizin.de/resource/supplementary/12933_2011_510_MOESM1_ESM.pdf/9538616)

**A** SERCA

PLB

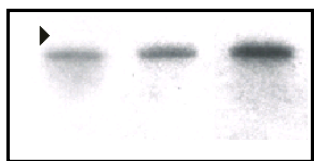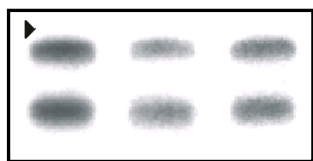**B**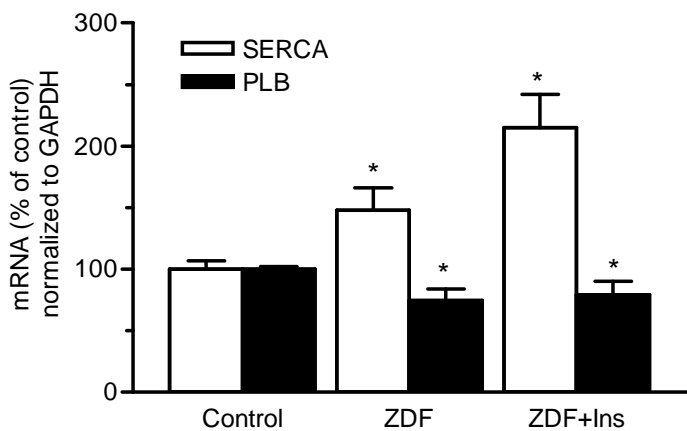**C**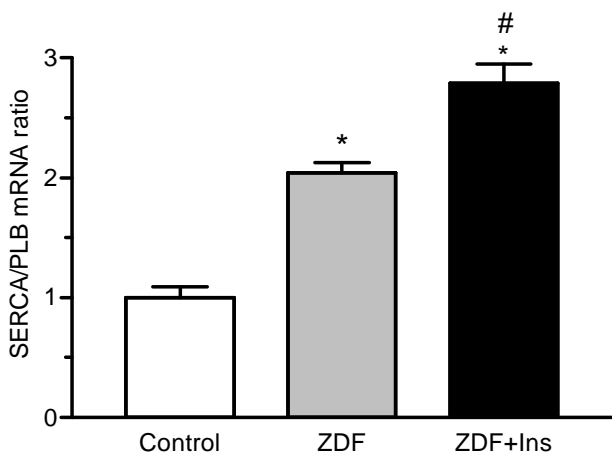

Supplement: MOESM1 [file 9538616]
